# Supplementary material
Source: publisher figshare collection journal article supplement (https://tandf.figshare.com/articles/dataset/_/24596512)
Supplement: Supplementary file 1 [file 1]

**Biographical notes**

Himawat Aryadita ([himawat@ub.ac.id](mailto:himawat@ub.ac.id)) is a doctoral candidate, Department of Management, Universitas Airlangga. He is a faculty member at Department of Information Systems, Faculty of Computer Science, Universitas Brawijaya Malang, Indonesia. His major research interests include Entrepreneurship, Startup and Product Development.

Badri Munir Sukoco ([badri@feb.unair.ac.id](mailto:badri@feb.unair.ac.id)) is a Professor at Department of Management, Director of Postgraduate School, Universitas Airlangga. He received his PhD from National Cheng Kung University. His major research interests include Strategic Alliance, Competitive Behavior, and Innovative/Imitative Behavior.

Maurice Lyver ([m.lyver@nutc.edu.tw](file:///C:\Users\Direktur%20SPS%20UNAIR\Downloads\m.lyver@nutc.edu.tw)) is an Assistant Professor at the DOAE, National Taichung University of Science and Technology, Taiwan. He received his PhD from National Chung Hsing University. His major research interests include Strategic Management, Alliances, Innovation, Technology Management, and Entrepreneurship.
